# Supplementary material for: Scleractinian corals (Fungiidae, Agariciidae and Euphylliidae) of Pulau Layang-Layang, Spratly Islands, with a note on Pavona maldivensis (Gardiner, 1905)
Source: Zookeys. 2015 Aug 12;(517):1–37. doi: 10.3897/zookeys.517.9308 (PMC4547123; doi:10.3897/zookeys.517.9308)
Supplement: Supplementary material 1 — Table S1 [file zookeys-517-001-s001.xls]

## Sheet: Supplementary file 1
Supplementary file 1: Table S1. Physical properties of seawater at Pulau Layang-Layang.
Site no.	Temp. (°C)	Salinity (ppt)	Dissolved Oxygen (mg/l)	pH	Date	Time (reading)
1	–	–	–	–	–	–
2	29.22	30.62	5.75	8.55	2017-03-25	1904-01-01 15:22:00
3	28.56	30.9	5.67	8.46	2017-03-26	1904-01-01 08:11:00
4	28.89	30.98	5.43	8.64	2017-03-26	1904-01-01 11:24:00
5	29.15	30.76	5.64	8.52	2017-03-26	1904-01-01 15:20:00
6	28.42	30.08	5.2	8.46	2017-03-27	1904-01-01 07:52:00
7	28.36	30.88	5.31	8.7	2017-03-27	1904-01-01 11:09:00
8	28.68	30.66	5.53	8.64	2017-03-27	1904-01-01 15:07:00
9	29.19	30.26	5.15	8.72	2017-03-28	1904-01-01 07:48:00
10	28.5	30.72	5.68	8.65	2017-03-28	1904-01-01 11:00:00
11	30.02	30.63	5.55	8.73	2017-03-28	1904-01-01 15:28:00
12	29.41	31.01	5.24	8.59	2017-03-29	1904-01-01 07:49:00
13	28.46	31.22	5.57	8.67	2017-03-29	1904-01-01 11:18:00
14	29.37	30.75	5.61	8.73	2017-03-29	1904-01-01 15:18:00
15	28.75	30.7	5.21	8.57	2017-03-30	1904-01-01 08:06:00
16	28.39	31.16	5.39	8.72	2017-03-30	1904-01-01 11:28:00
17	28.64	31.08	5.7	8.67	2017-03-30	1904-01-01 15:24:00
18	29.27	30.39	5.36	8.59	2017-03-31	1904-01-01 07:55:00
