# Supplementary material for: Scleractinian corals (Fungiidae, Agariciidae and Euphylliidae) of Pulau Layang-Layang, Spratly Islands, with a note on Pavona maldivensis (Gardiner, 1905)
Source: Zookeys. 2015 Aug 12;(517):1–37. doi: 10.3897/zookeys.517.9308 (PMC4547123; doi:10.3897/zookeys.517.9308)
Supplement: Supplementary material 2 — Table S2 [file zookeys-517-001-s002.xls]

## Sheet: Supplementary file 2
Supplementary file 2: Table S2. Coral samples included in the molecular analyses with supporting collection and locality data.
Specimen details									GenBank accession number
Field Col. No.	Registration No.	In situ ID	Specimen ID	Collector	Date	Locality	Lat (N)	Long (E)	IGR	ITS
BAN01	RMNH Coel. 41654	Pavona explanulata	Pavona explanulata	Z. Waheed	2012-09-20	Banggi, North Sabah, Malaysia	07° 05'16.0"	117° 01'31.0"	−	KR706127
BAN02	RMNH Coel. 41655	Pavona maldivensis	Pavona explanulata	Z. Waheed	2012-09-20	Banggi, North Sabah, Malaysia	07° 04'27.0"	117° 01'38.0"	−	KR706128
TER23	RMNH Coel. 41656	Pavona maldivensis	Pavona explanulata	SET van der Meij	2013-11-07	Ternate, Indonesia	0° 52' 2.0"	127° 19 45.8"	−	KR706129
TER28	RMNH Coel. 41657	Pavona explanulata	Pavona explanulata	SET van der Meij	2013-11-10	Gura Ici, Indonesia	0° 01' 51.9"	127° 14' 1.8"	KR706116	KR706130
TER35	RMNH Coel. 41658	Pavona explanulata	Pavona explanulata	SET van der Meij	2013-11-13	Tidore, Indonesia	0° 42' 44.1"	127° 28' 47.3"	KR706117	KR706131
LAC07	RMNH Coel. 41659	Pavona sp.	Pavona maldivensis	Z. Waheed	2017-03-27	Layang-Layang, Spratly Islands	07° 22.191	113° 47.701	KR706118	KR706132
LAC13	IPMB-C 13.00010	Pavona sp.	Pavona maldivensis	B.W. Hoeksema	2017-03-27	Layang-Layang, Spratly Islands	07° 22.876	113° 48.910	KR706119	KR706133
LAC14	IPMB-C 13.00011	Pavona sp.	Pavona maldivensis	B.W. Hoeksema	2017-03-27	Layang-Layang, Spratly Islands	07° 22.876	113° 48.910	−	KR706134
LAC23	IPMB-C 13.00017	Pavona sp.	Pavona maldivensis	Z. Waheed	2017-03-30	Layang-Layang, Spratly Islands	07° 23.013	113° 50.912	KR706120	KR706135
LAC24	IPMB-C 13.00018	Pavona sp.	Pavona maldivensis	Z. Waheed	2017-03-30	Layang-Layang, Spratly Islands	07° 23.013	113° 50.912	KR706121	KR706136
LAC25	IPMB-C 13.00019	Pavona sp.	Pavona maldivensis	Z. Waheed	2017-03-31	Layang-Layang, Spratly Islands	07° 21.902	113° 49.778	KR706122	KR706137
LAC27	IPMB-C 13.00020	Pavona sp.	Pavona maldivensis	Z. Waheed	2017-03-31	Layang-Layang, Spratly Islands	07° 21.902	113° 49.778	KR706123	KR706138
RED05	IPMB-C 14.00010	Pavona cf. explanulata	Pavona cf. explanulata	Z. Waheed	2017-07-02	Redang, Terengganu, Malaysia	05° 45' 36.7"	103° 02' 10.4"	KR706124	KR706139
LOY03	RMNH Coel. 41662	Pavona maldivensis	Pavona maldivensis	B.W. Hoeksema	2018-02-17	Loyalty Islands, New Caledonia	21° 29.204' S	168° 07.164'	−	KR706140
LOY12	RMNH Coel. 41663	Pavona maldivensis	Pavona maldivensis	B.W. Hoeksema	2018-02-21	Loyalty Islands, New Caledonia	20° 55.067' S	167° 04.311'	KR706125	KR706141
MAL18	RMNH Coel. 41664	Pavona maldivensis	Pavona maldivensis	B.W. Hoeksema	2018-05-18	Maaga, Maldives	03° 07' 11.5''	72° 56' 21.7''	KR706126	KR706142
MAL	RMNH Coel. 41665	Pavona maldivensis	Pavona maldivensis	F. Benzoni	2018-05-09	Biledhdhoo, Faafu Atoll, Maldives	03° 07' 14.2''	72° 58' 46.9''	−	KR706143
−	(GenBank)	-	Pavona maldivensis	−	−	−	−	−	KF437780	−
−	(GenBank)	-	Pavona cf. explanulata	−	−	−	−	−	KF437762	−
HS2854	(GenBank)	-	Leptoseris foliosa	−	−	−	−	−	LK934507	−
HS2854	(GenBank)	-	Leptoseris foliosa	−	−	−	−	−	−	HE978501
